# Supplementary material for: Disparities in fatal and non-fatal injuries between Irish travellers and the Irish general population are similar to those of other indigenous minorities: a cross-sectional population-based comparative study
Source: HighWire-hosted journal article supplement (doi:10.1136/bmjopen-2012-002296), 2013-01-01
Supplement: bmjopen-2012-002296supp_table.pdf [file bmjopen-2012-002296supp_table.pdf]

Appendix table: Formulas used in calculating Potential Years of Life Lost (PYLL), Standardized Mortality Ratios (SMR) and Standardized Incidence Ratios (SIR), with their confidence intervals

| Formula                                                                                                                                                                                                                                      | Description of parameters                                                                                                                                                                                                                                                                                                                                                                                                                                            |
|----------------------------------------------------------------------------------------------------------------------------------------------------------------------------------------------------------------------------------------------|----------------------------------------------------------------------------------------------------------------------------------------------------------------------------------------------------------------------------------------------------------------------------------------------------------------------------------------------------------------------------------------------------------------------------------------------------------------------|
| <p>PYLL:</p> $\sum_{i=1}^{\omega} d_i a_i$ $a_i = 100 - x_i$                                                                                                                                                                                 | <p><math>i</math> = age group (ten year age groups as very small numbers would arise from finer disaggregation; separate groups for infants and for those aged 1-4 years were formed to accommodate differences in average age of death)</p> <p><math>\omega</math> = open-ended age group (85 years or over)</p> <p><math>d</math> = number of injury deaths and</p> <p><math>a</math> = number of years remaining</p> <p><math>x</math> = average age at death</p> |
| <p>Age Standardized PYLL rate:</p> $\sum_{i=1}^{\omega} \frac{d_i a_i}{n_i} \cdot \frac{N_i}{N}$                                                                                                                                             | <p><math>n</math> = Irish Travellers population number</p> <p><math>N</math> = General population number</p>                                                                                                                                                                                                                                                                                                                                                         |
| <p>Confidence interval for age-Standardized PYLL rate ratio (27):</p> $V = Var(z) = \sum_{j=1}^2 \left[ \frac{\sum a_i^2 N_i^2 \pi_{ji} (1 - \pi_{ji})}{n_{ji}} \right] / (r_j^2 N^2)$ $CLL, CLu (r_2/r_1) = \exp(Z_0 \pm 1.96\sqrt{V}) - 1$ | <p><math>z</math> = age-standardized PYLL ratio</p> <p><math>\pi</math> =</p> <p><math>r_1</math> = PYLL rate of the general population</p> <p><math>r_2</math> = age-standardized PYLL rate ratio of Irish Travellers</p> <p>CLI = Lower Confidence Limit</p> <p>CLu = Upper Confidence Limit</p>                                                                                                                                                                   |

| Formula                                                                                                                                                                                                                 | Description of parameters                                                                                                                                                                                                                                                                                                                                                                                                                                                                                                                                                                                                                                                             |
|-------------------------------------------------------------------------------------------------------------------------------------------------------------------------------------------------------------------------|---------------------------------------------------------------------------------------------------------------------------------------------------------------------------------------------------------------------------------------------------------------------------------------------------------------------------------------------------------------------------------------------------------------------------------------------------------------------------------------------------------------------------------------------------------------------------------------------------------------------------------------------------------------------------------------|
| <p>SMR and SIR:</p> $SMR/SIR = 100 \times \frac{o}{e}$ $e = \sum_{i=1}^k n_i R_i$                                                                                                                                       | <p><math>o</math> = observed number of Traveller deaths for SMR or Traveller respondents with injury for SIR</p> <p><math>e</math> = expected number of deaths or respondents with injury</p> <p><math>i</math> = age group (ten year age groups)</p> <p><math>k</math> = open-ended age interval (85 years or over for SMR and 75 years or over for SIR)</p> <p><math>n_i</math> = number of Travellers in the <math>i^{th}</math> age group</p> <p><math>R_i</math> = mortality rate (for SMR) or retrospective incidence rate (for SIR) in the <math>i^{th}</math> age group of the general population. Incidence rate was based on those who responded to the injury question</p> |
| <p>Confidence intervals for SMR/SIR (28):</p> $Lower\ Limit = \frac{\left(\chi^2_{\frac{\alpha}{2}, 2o}\right)}{2e} \times 100$ $Upper\ Limit = \frac{\left(\chi^2_{1-\frac{\alpha}{2}, 2(o+1)}\right)}{2e} \times 100$ | <p><math>\chi^2</math> = Chi-square value at degrees of freedom of <math>2o / 2(o+1)</math></p>                                                                                                                                                                                                                                                                                                                                                                                                                                                                                                                                                                                       |
